# Supplementary material
Source: ML conference proceedings conference paper supplement (https://openaccess.thecvf.com/content/WACV2021/html/Saeedan_Boosting_Monocular_Depth_WACV_2021_paper.html)
Supplement: Supplementary file 1 [file Saeedan_Boosting_Monocular_Depth_WACV_2021_supplemental.pdf]

# Boosting Monocular Depth with Panoptic Segmentation Maps

## – Supplemental Material –

Faraz Saeedan      Stefan Roth  
 Department of Computer Science, TU Darmstadt

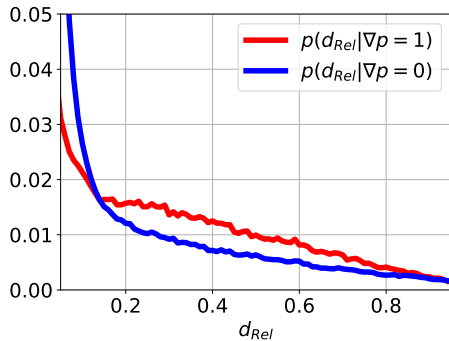

Figure 6. The histogram of  $p(d_{rel}|\nabla_p = 0)$  (blue) and  $p(d_{rel}|\nabla_p = 1)$  (red). Strong depth continuities are more probable to coincide with panoptic boundary locations ( $\nabla_p = 1$ ).

$\delta < 1.25^2$ , and  $\delta < 1.25^3$ . The first four measures are errors, hence the lower the better. For the last 3 evaluation metrics, the higher value indicates a better accuracy.

### A. Empirical Motivation

To confirm the visual observations in Fig. 1 of the main paper, we take 200 images from the Synscapes dataset [36] and plot the histogram of relative edge strengths conditioned on whether or not they coincide with the edges of the panoptic maps. Fig. 6 shows the results. Here, we identify panoptic discontinuities as

$$\nabla_p = (1 - \delta(\nabla_x p)) \vee (1 - \delta(\nabla_y p)), \quad (11)$$

where  $\nabla_x$  and  $\nabla_y$  are the differences between adjacent pixels in  $x$  and  $y$  direction, respectively.  $\delta$  is the Dirac delta and  $\vee$  denotes the pixel-wise logical OR operator.

We clearly observe that the conditional probability of strong depth edges is higher for panoptic boundaries than away from boundaries, which motivates our panoptic depth boost loss in the main paper.

### B. Detailed Experimental Results

Here, we additionally show the full evaluation of the experiments for all our models and the baselines from the main paper in Tables 5 to 8 below. For all models we report values for the absolute relative difference (*Abs. Rel.*), squared relative difference (*Sq. Rel.*), root mean squared error linear (RMSE) and logarithm (RMSE<sub>log</sub>),  $\delta < 1.25$ ,

| Method                   | Abs. Rel.     | Sq. Rel.      | RMSE         | RMSE <sub>log</sub> | $\delta < 1.25$ | $\delta < 1.25^2$ | $\delta < 1.25^3$ |
|--------------------------|---------------|---------------|--------------|---------------------|-----------------|-------------------|-------------------|
| Xu <i>et al.</i> [38]    | 0.246         | 4.060         | 7.117        | 0.428               | 0.786           | 0.905             | 0.945             |
| Zhang <i>et al.</i> [41] | 0.234         | 3.776         | 7.104        | 0.416               | 0.776           | 0.903             | 0.949             |
| Wang <i>et al.</i> [33]  | 0.227         | 3.800         | <b>6.917</b> | 0.414               | <b>0.801</b>    | 0.913             | 0.950             |
| Ours                     | <b>0.1783</b> | <b>2.9270</b> | 9.023        | <b>0.248</b>        | 0.771           | <b>0.922</b>      | <b>0.971</b>      |

Table 5. Complete results for Table 1 of the main paper.

| Method           | Abs. Rel.    | Sq. Rel.     | RMSE         | RMSE <sub>log</sub> | $\delta < 1.25$ | $\delta < 1.25^2$ | $\delta < 1.25^3$ |
|------------------|--------------|--------------|--------------|---------------------|-----------------|-------------------|-------------------|
| Godard (M) [11]  | 0.141        | 1.186        | 5.677        | 0.238               | 0.809           | 0.928             | 0.969             |
| Chen [3]         | 0.118        | 0.905        | 5.096        | 0.211               | 0.839           | 0.945             | 0.977             |
| M + panoptic     | <b>0.111</b> | <b>0.870</b> | <b>4.92</b>  | <b>0.206</b>        | <b>0.849</b>    | <b>0.951</b>      | <b>0.979</b>      |
| Godard (M2) [12] | 0.107        | 0.849        | 4.764        | 0.201               | 0.874           | 0.953             | 0.977             |
| M2 + panoptic    | <b>0.103</b> | <b>0.840</b> | <b>4.761</b> | <b>0.200</b>        | <b>0.879</b>    | <b>0.958</b>      | <b>0.980</b>      |

Table 6. Complete results for Table 2 of the main paper.

| Method                               | Abs. Rel.    | Sq. Rel.     | RMSE         | RMSE <sub>log</sub> | $\delta < 1.25$ | $\delta < 1.25^2$ | $\delta < 1.25^3$ |
|--------------------------------------|--------------|--------------|--------------|---------------------|-----------------|-------------------|-------------------|
| Monodepth [11]                       | 0.148        | 2.104        | 6.439        | 0.224               | 0.839           | 0.936             | 0.972             |
| Ramirez <i>et al.</i> [28]           | 0.144        | 1.973        | 6.199        | 0.217               | <b>0.849</b>    | <b>0.940</b>      | 0.975             |
| Geometric baseline                   | 0.147        | 1.998        | 6.312        | 0.221               | 0.835           | 0.936             | 0.973             |
| + $\mathcal{L}_{\text{pgs}}$         | 0.142        | 1.989        | 6.306        | 0.219               | 0.848           | <b>0.940</b>      | 0.976             |
| + $\mathcal{L}_{\text{plr}}$         | 0.138        | 1.951        | 6.206        | 0.215               | 0.842           | 0.930             | <b>0.977</b>      |
| + $\mathcal{L}_{\text{pga}}$ (Final) | <b>0.135</b> | <b>1.949</b> | <b>6.203</b> | <b>0.214</b>        | 0.848           | 0.939             | 0.976             |

Table 7. Complete results for Table 3 of the main paper.

| Segmentation | Abs. Rel.    | Sq. Rel.     | RMSE         | RMSE <sub>log</sub> | $\delta < 1.25$ | $\delta < 1.25^2$ | $\delta < 1.25^3$ |
|--------------|--------------|--------------|--------------|---------------------|-----------------|-------------------|-------------------|
| Geometric    | 0.147        | 1.998        | 6.312        | 0.221               | 0.835           | 0.936             | 0.973             |
| G+Semantic   | 0.141        | 1.963        | 6.284        | 0.216               | 0.840           | 0.939             | 0.975             |
| G+Panoptic   | <b>0.135</b> | <b>1.949</b> | <b>6.203</b> | <b>0.214</b>        | <b>0.848</b>    | <b>0.939</b>      | <b>0.976</b>      |

Table 8. Complete results for Table 4 of the main paper.
